# Supplementary figures and images for: Dilatory is a Drosophila protein related to AZI1 (CEP131) that is located at the ciliary base and required for cilium formation
Source: PubMed Central journal article supplement — J Cell Sci. 2011 Aug 1;124(15):2622–30. doi: 10.1242/jcs.084798 (PMC3138703; doi:10.1242/jcs.084798), 2011-08-01

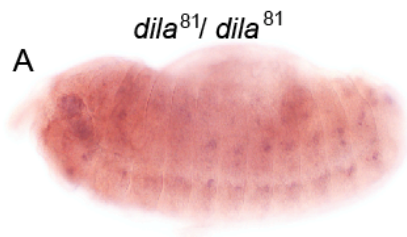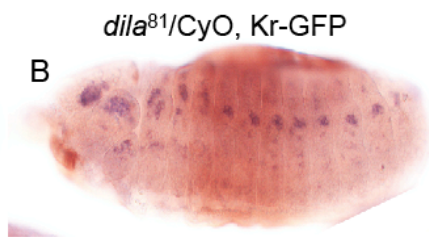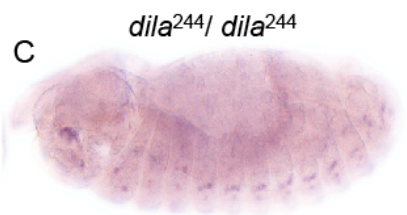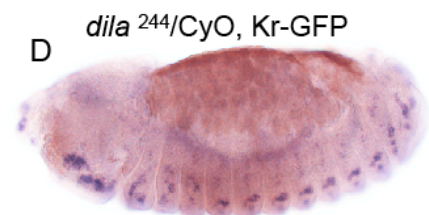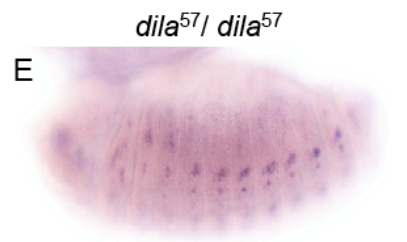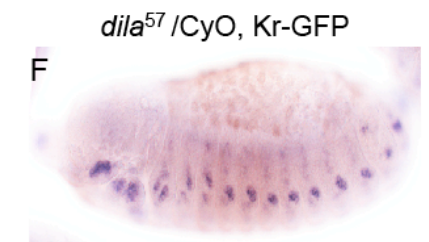

Supplement: supp_jcs.084798_JCS084798FigS1.pdf [file supp_jcs.084798_JCS084798FigS1.pdf]
